# Supplementary material for: Impact of anesthetic agents on overall and recurrence-free survival in patients undergoing esophageal cancer surgery: A retrospective observational study
Source: PubMed Central journal article supplement (PMC5656640; doi:10.1038/s41598-017-14147-9), 2017-10-25

# **-Supplementary Materials-**

## **Impact of anesthetic agents on overall and recurrence-free survival in patients undergoing esophageal cancer surgery: A retrospective observational study**

In-Jung Jun, Jun-Young Jo, Jong-Il Kim, Ji-Hyun Chin, Wook-Jong Kim,  
Hyeong Ryul Kim, Eun-Ho Lee, In-Cheol Choi

### **Table of Contents**

**Table S1:** Baseline characteristics in matched patients after propensity scoring

**Table S2:** Variables associated with overall survival after esophageal cancer surgery in Cox proportional hazard regression model

**Table S3:** Comparisons of results for primary analysis of overall survival and recurrence-free survival compared with sensitivity analyses

**Figure S1:** Use of anesthetic techniques according to year of surgery

**Figure S2:** Association between anesthesia type and overall survival (A) and recurrence-free survival (B) in subgroups

**Table S1.** Baseline characteristics in matched patients after propensity scoring

| Variable                             | VA group   | TIVA group | STD    |
|--------------------------------------|------------|------------|--------|
| N                                    | 166        | 439        |        |
| Demographics                         |            |            |        |
| Age (yr)                             | 62.9 ± 7.1 | 62.8 ± 7.2 | 0.016  |
| Male gender                          | 159 (95.8) | 411 (93.6) | 0.097  |
| Clinical characteristics             |            |            |        |
| Body mass index (kg/m <sup>2</sup> ) | 23.0 ± 3.0 | 23.1 ± 2.9 | 0.020  |
| ASA class                            |            |            | 0.085  |
| I                                    | 15 (9.0)   | 33 (7.5)   |        |
| II                                   | 149 (89.8) | 397 (90.4) |        |
| III                                  | 2 (1.2)    | 9 (2.1)    |        |
| Medical history                      |            |            |        |
| Diabetes mellitus                    | 21 (12.7)  | 66 (15.0)  | 0.069  |
| Hypertension                         | 59 (35.5)  | 156 (35.5) | 0.0001 |
| Dyslipidemia                         | 13 (7.8)   | 37 (8.4)   | 0.022  |
| Coronary artery disease              | 2 (1.2)    | 6 (1.4)    | 0.014  |
| Cerebral vascular disease            | 5 (3.0)    | 18 (4.1)   | 0.059  |
| Peripheral vascular disease          | 2 (1.2)    | 11 (2.5)   | 0.097  |
| COPD                                 | 3 (1.8)    | 8 (1.8)    | 0.001  |
| eGFR < 60 mL/min/1.73 m <sup>2</sup> | 7 (4.2)    | 20 (4.6)   | 0.017  |
| Liver disease                        | 13 (7.8)   | 39 (8.9)   | 0.038  |
| Smoker, current                      | 41 (24.7)  | 114 (26.0) | 0.029  |
| Alcohol status                       | 145 (87.4) | 380 (86.6) | 0.023  |

|                         |               |               |       |
|-------------------------|---------------|---------------|-------|
| Chemo-radiation therapy | 69 (41.6)     | 178 (40.6)    | 0.021 |
| Laboratory data         |               |               |       |
| Hematocrit (%)          | 37.7 ± 4.9    | 37.8 ± 5.0    | 0.021 |
| Creatinine (mg/dL)      | 0.9 [0.8–1.0] | 0.8 [0.7–0.9] | 0.049 |
| Total bilirubin (mg/dL) | 0.5 [0.4–0.7] | 0.6 [0.4–0.7] | 0.075 |
| Albumin (g/dL)          | 3.7 ± 0.4     | 3.7 ± 0.4     | 0.027 |
| FEV <sub>1</sub> / FVC  | 72.2 ± 9.9    | 72.5 ± 9.3    | 0.028 |
| Medication              |               |               |       |
| ACEI or ARB             | 27 (16.3)     | 73 (16.6)     | 0.010 |
| Beta blocker            | 10 (6.0)      | 32 (7.3)      | 0.051 |
| Calcium channel blocker | 28 (16.9)     | 84 (19.1)     | 0.059 |
| Insulin                 | 21 (12.7)     | 63 (14.4)     | 0.050 |
| Oral hypoglycemic agent | 16 (9.6)      | 45 (10.3)     | 0.021 |
| Statin                  | 12 (7.2)      | 37 (8.4)      | 0.045 |
| Aspirin                 | 10 (6.0)      | 31 (7.1)      | 0.042 |
| Plavix                  | 2 (1.2)       | 10 (2.3)      | 0.082 |
| Diuretics               | 9 (5.4)       | 28 (16.4)     | 0.041 |

---

Data are expressed as number of patients (%), mean ± standard deviation, or median [first-third quartiles].

VA = volatile inhalational anesthesia; TIVA = total intravenous anesthesia; STD = standardized difference; ASA = American Society of Anesthesiology; COPD = chronic obstructive pulmonary disease; eGFR = estimated glomerular filtration rate; FEV<sub>1</sub> = forced expiratory volume in 1 second; FVC = forced vital capacity; ACEI = angiotensin-converting enzyme inhibitor; ARB = angiotensin receptor blocker.

**Table S2.** Variables associated with overall survival after esophageal cancer surgery in Cox proportional hazard regression model

| Variable                                | Hazard Ratio | 95% CI     | <i>P</i> value |
|-----------------------------------------|--------------|------------|----------------|
| VA group                                | 1.58         | 1.24–2.01  | < 0.001        |
| Age (yr)                                | 1.02         | 1.00–1.03  | 0.011          |
| Body mass index (kg/m <sup>2</sup> )    | 0.91         | 0.88–0.95  | < 0.001        |
| Diabetes mellitus                       | 1.29         | 0.99–1.67  | 0.059          |
| Preoperative chemo-radiation therapy    | 1.61         | 1.26–2.06  | < 0.001        |
| Preoperative serum albumin level (g/dL) | 0.53         | 0.40–0.70  | < 0.001        |
| Pathologic stage of cancer              |              |            |                |
| I                                       | 1.36         | 0.96–1.92  | 0.084          |
| II                                      | 2.85         | 2.09–3.88  | < 0.001        |
| III                                     | 6.31         | 4.51–8.81  | < 0.001        |
| IV                                      | 8.70         | 4.41–17.16 | < 0.001        |
| pRBC (unit) given intraoperatively      | 1.10         | 1.02–1.20  | 0.016          |
| Postoperative myocardial dysfunction    | 1.37         | 1.06–1.78  | 0.015          |
| Postoperative sepsis                    | 1.59         | 1.20–2.11  | 0.001          |

CI = confidence interval; VA = volatile inhalational anesthesia; pRBC = packed red blood cell.

**Table S3.** Comparisons of results for primary analysis of overall survival and recurrence-free survival compared with sensitivity analyses

|                                           | VA group                       |                |
|-------------------------------------------|--------------------------------|----------------|
|                                           | Adjusted Hazard Ratio (95% CI) | <i>P</i> value |
| Overall survival                          |                                |                |
| Primary model*                            | 1.58 (1.24–2.01)               | < 0.001        |
| Adjusted for epidural analgesia           | 1.55 (1.22–1.98)               | < 0.001        |
| Adjusted for one lung ventilation time    | 1.59 (1.26–2.04)               | < 0.001        |
| Adjusted for year of surgery              | 1.61 (1.26–2.06)               | < 0.001        |
| Adjusted for type of surgery              | 1.57 (1.24–1.99)               | < 0.001        |
| Adjusted for minimally invasive surgery   | 1.58 (1.24–2.00)               | < 0.001        |
| Adjusted for type of esophageal carcinoma | 1.58 (1.24–2.01)               | < 0.001        |
| Pre- and intra-operative variables only   | 1.49 (1.18–1.89)               | 0.001          |
| Recurrence-free survival                  |                                |                |
| Primary model†                            | 1.42 (1.12–1.79)               | 0.003          |
| Adjusted for epidural analgesia           | 1.40 (1.10–1.77)               | 0.005          |
| Adjusted for one lung ventilation time    | 1.43 (1.13–1.80)               | 0.003          |
| Adjusted for year of surgery              | 1.42 (1.12–1.79)               | 0.004          |
| Adjusted for type of surgery              | 1.42 (1.12–1.79)               | 0.003          |
| Adjusted for minimally invasive surgery   | 1.41 (1.12–1.79)               | 0.004          |
| Adjusted for type of esophageal carcinoma | 1.41 (1.12–1.78)               | 0.004          |
| Adjusted for postoperative CRT            | 1.42 (1.12–1.79)               | 0.003          |

\*: adjusted by age, body mass index, diabetes mellitus, preoperative chemo-radiation therapy, preoperative albumin levels, pathologic stage of cancer, pRBC given intraoperatively, postoperative myocardial dysfunction (except pre- and intra-operative variable model), and

postoperative sepsis (except pre- and intra-operative variable model).

†: adjusted by age, body mass index, preoperative chemo-radiation therapy, preoperative albumin levels, pathologic stage of cancer, and pRBC given intraoperatively.

VA = volatile inhalational anesthesia; CI = confidence interval; CRT = chemo-radiation therapy; pRBC = packed red blood cell.

**Figure S1:** Use of anesthetic techniques according to year of surgery

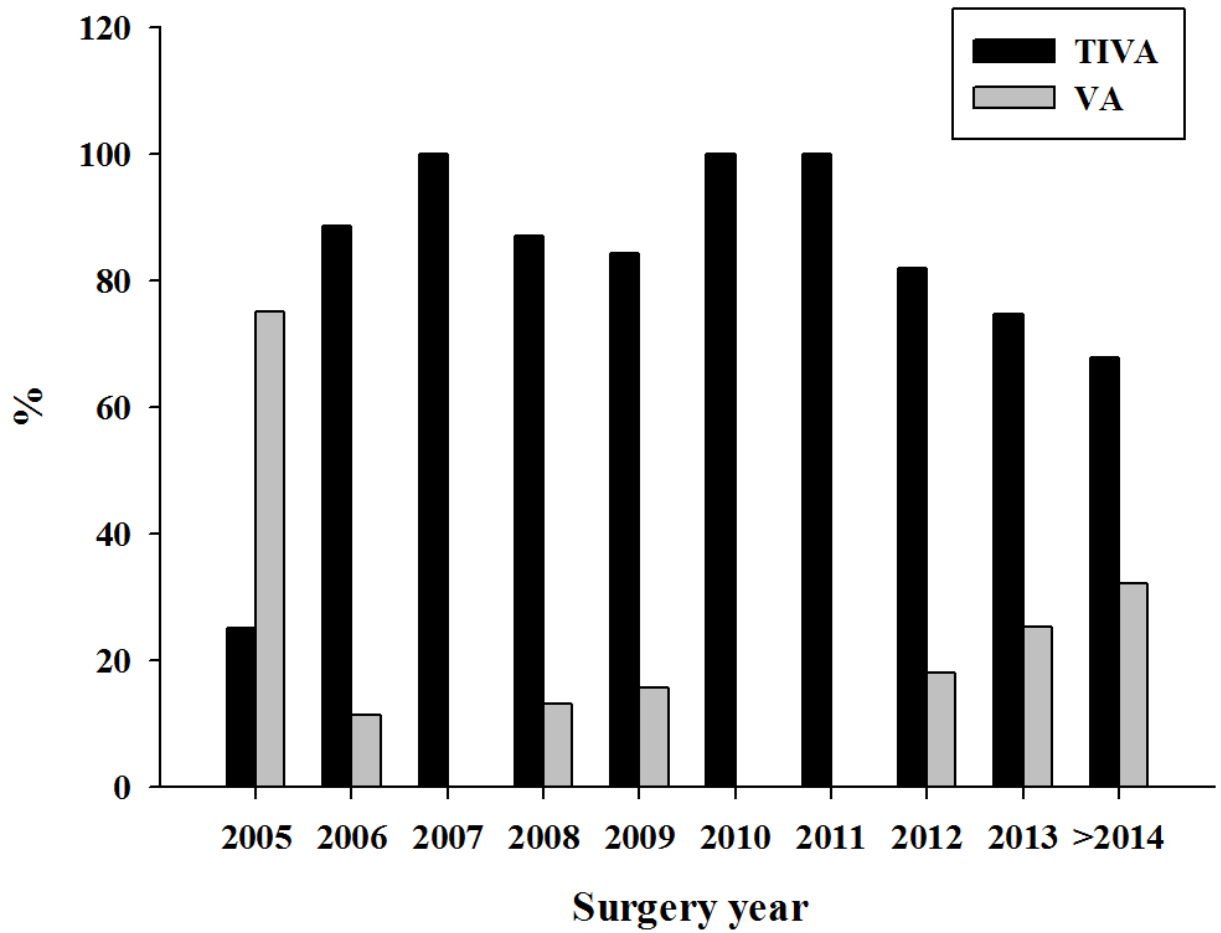

|                        |           |           |           |           |           |           |           |            |            |            |
|------------------------|-----------|-----------|-----------|-----------|-----------|-----------|-----------|------------|------------|------------|
| <b>Number of cases</b> | <b>64</b> | <b>53</b> | <b>51</b> | <b>69</b> | <b>70</b> | <b>80</b> | <b>89</b> | <b>133</b> | <b>111</b> | <b>202</b> |
| <b>TIVA</b>            | <b>16</b> | <b>47</b> | <b>51</b> | <b>60</b> | <b>59</b> | <b>80</b> | <b>89</b> | <b>109</b> | <b>83</b>  | <b>137</b> |
| <b>VA</b>              | <b>48</b> | <b>6</b>  | <b>0</b>  | <b>9</b>  | <b>11</b> | <b>0</b>  | <b>0</b>  | <b>24</b>  | <b>28</b>  | <b>65</b>  |

**Figure S2:** Association between anesthesia type and overall survival (A) and recurrence-free survival (B) in subgroups

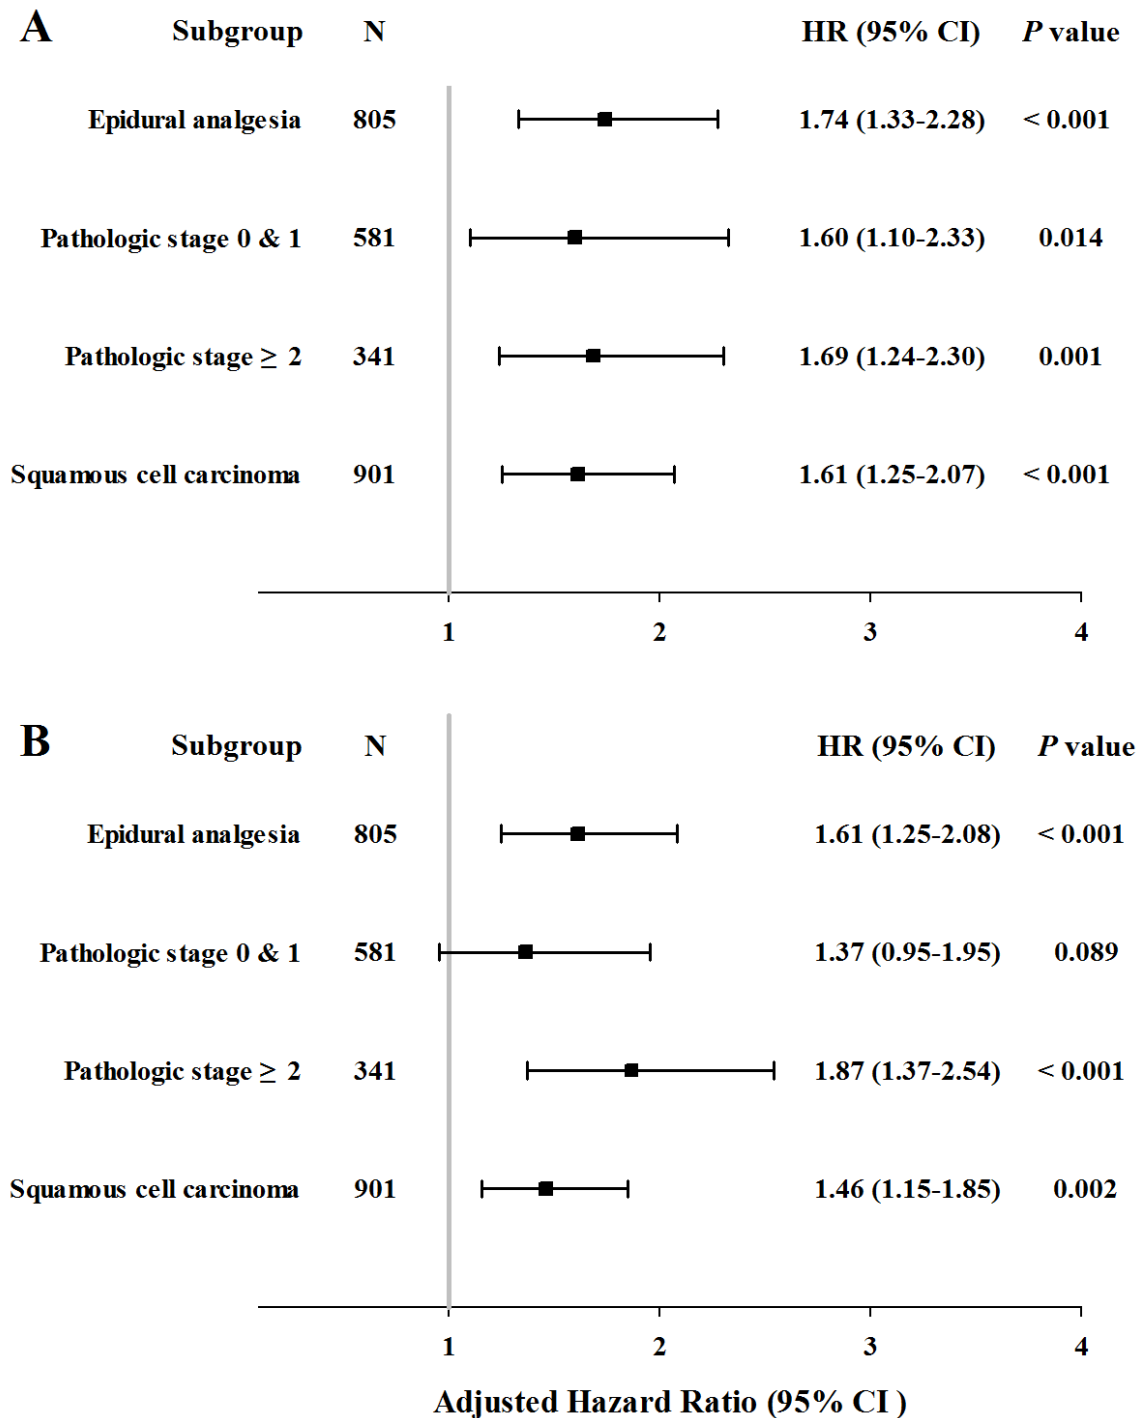

Supplement: 41598_2017_14147_MOESM1_ESM.pdf [file 41598_2017_14147_MOESM1_ESM.pdf]
